# Supplementary material
Source: PubMed Central journal article supplement (PMC6849953)
Supplement: baADV2019000051-suppl1.pdf [file baADV2019000051-suppl1.pdf]

## Supplementary Information

### Supplementary Materials & Methods

#### Patient samples

All patients were enrolled in multicenter pediatric ALL trials (AIEOP-BFM ALL, CoALL, ALL-SCT BFM, ALL-REZ BFM 2002) and the ALL-REZ BFM registry. The treatment studies, the registry and the concomitant research were all approved by the respective institutional review boards and informed consent was obtained from all patients and/or their legal guardians. Patients with frank hematologic post-allo-SCT relapse were identified in the database of the ALL-SCT-BFM 2003 trial, after treatment of primary disease or first relapse in either the ALL-BFM, CoALL, or ALL-REZ-BFM trial, respectively. Bone marrow specimens representing pre- and post-allo-SCT relapse, as well as leukemia-free patient and donor germline were obtained from the ALL-REZ-BFM biobank, with missing samples provided by the frontline ALL trials and/or local treatment centers.

#### Primer sequences for Sanger sequencing

TP53-f1 TCCCCTGCCCTCAACAAG, TP53-r1 GCACCACCACACTATGTTCG,  
TP53-f2 TGTGTTATCTCCTAGGTTGGC, TP53-r2 AGTGTGCAGGGTGGCAAG,  
NT5C2-f1 AATGTCAACCTCCTGGAGTG, NT5C2-r1  
CTGTAAAATGAAGTCCCCTTC, NT5C2-f2 TGATTTTCTGTCTGGACGGAG,  
NT5C2-r2 GAGGCTAAAGGTTCTCTGTAC, NOTCH1-f  
TGCCTCACCATGTCCTGAC, NOTCH1-r CACACTTACTCTGCACGGC

#### Amplicon sequencing

For deep sequencing of *NT5C2* and *TP53* mutations, Illumina TruSeq Adapters were used with the following product-specific primers: *NT5C2* K26E forward: AATGTCAACCTCCTGGAGTG, reverse: CTGTAAAATGAAGTCCCCTTC; *NT5C2* D113N forward: TGATTTTCTGTCTGGACGGAG, reverse: GAGGCTAAAGGTTCTCTGTAC; *NT5C2* R367Q forward: TCTGATACGATCTGTGACCTG, reverse: ACTCTTGTCAGTCCAGACATG; *TP53* V173M/R181H/R196\* forward: ATCTACAAGCAGTCACAGCAC, reverse: GCACCACCACACTATGTTCG; *TP53* G245S/R248P/R248Q forward: TGTGTTATCTCCTAGGTTGGC, reverse: AGTGTGCAGGGTGGCAAG. In a total volume of 25  $\mu$ l, 20 ng DNA were amplified with 0.5  $\mu$ l 10  $\mu$ M each forward and reverse primers, 0.5  $\mu$ l 10 mM each dNTPs (QIAGEN, Hilden, Germany), 2.5  $\mu$ l 10x PCR Buffer (QIAGEN), and 0.1  $\mu$ l Taq Polymerase (QIAGEN). PCR conditions were as follows: 2 min initial denaturation at 94°C, ten cycles of 94°C, 65°C-1°C per cycle, 72°C, 25 cycles of 94°C, 55°C, and 72°C. The PCR products were separated on an agarose gel, cut from it, and clean up was performed

with the QIAquick Gel Extraction Kit (QIAGEN). The extracted DNA was measured on a Bioanalyzer 2100 (Agilent, Santa Clara, USA) and brought to a concentration of 2 nM prior to sequencing. Sequencing was carried out on an Illumina HiSeq 2500.

### ***Deep sequencing analysis***

After extraction of the sequencing reads (see “data processing”) and alignment to the genomic target regions of the studied TP53 and NT5C2 SNVs, we assessed the background error rate and thus defined the individual sensitivity for SNV detection in each sequenced sample. To achieve this goal, we calculated the mean and standard deviation of the specific variant allele frequency at the five nearest genomic loci with the identified reference base as in the genomic position of the SNV under study. Variant allele frequencies at the locus of analysis were considered “truly positive” if exceeding the mean plus three standard deviations (i.e. representing the upper limit of the 95% confidence interval) of the background error rate as defined above. Values below this threshold were considered “negative” and are reported as <0.2% or <0.1% in the figures and the respective Supplementary Tables depending on the sequencing depth reached.

### ***Computation of oncogenomes***

Oncogenomes were computed from the variant calls combining MuTect<sup>1</sup> and VarScan2<sup>2</sup> tools. SNVs were kept for further analysis only if they met the following criteria: region covered at least 10x in all samples of a patient set; had a general minor allele frequency (GMAF) of less than 1%; and were mapped to canonical transcripts. The datasets were compiled and analyzed using R. Genes associated with DNA repair, DNA Polymerase function and Fanconi anemia were extracted from the gene families 'Fanconi anemia complementation groups (FANC)' and 'DNA polymerases (POL)' from HGNC database [HGNC].

## **Supplementary Tables**

### ***Supplementary Table 1: Detailed patient characteristics***

| Patient ID                                      | 107                     | 202                                     | 316                | 318                | 337                     | 514                 | 590                 | 660                 | 685                                    | 735                 |
|-------------------------------------------------|-------------------------|-----------------------------------------|--------------------|--------------------|-------------------------|---------------------|---------------------|---------------------|----------------------------------------|---------------------|
| Sex                                             | f                       | f                                       | m                  | m                  | m                       | m                   | f                   | m                   | f                                      | m                   |
| Age at first diagnosis of disease (in years)    | 0.3                     | 5.7                                     | 1.0                | 5.3                | 2.8                     | 2.5                 | 7.3                 | 5.1                 | 5.7                                    | 10.2                |
| Immunophenotype at first disease                | common ALL              | common ALL                              | common ALL         | common ALL         | common ALL              | common ALL          | common ALL          | cortical T          | pro-T                                  | pB-ALL              |
| CNS disease / status at first disease           | TLP+                    | CNS negative                            | TLP+               | CNS negative       | CNS negative            | CNS positive        | CNS negative        | TLP+                | CNS positive                           | CNS negative        |
| treatment protocol at first disease             | interfant 06            | CoALL                                   | ALL-BFM            | ALL-BFM            | CoALL                   | CoALL               | ALL-BFM             | ALL-BFM             | ALL-BFM                                | CoALL               |
| risk category at first disease                  | HR                      | LR intensified                          | HR                 | HR                 | HR                      | HR-S                | MR                  | HR                  | HR                                     | HR                  |
| Age at relapse (in years)                       | no relapse prior to SCT | 7.5                                     | 3.3                | 7.7                | 5.9                     | 5.0                 | 10.7                | 6.4                 | 6.8                                    | 12.3                |
| Type of relapse (BM, CNS, other extramedullary) |                         | BM                                      | BM                 | KM                 | BM                      | BM                  | BM                  | BM                  | BM                                     | BM                  |
| Treatment protocol at relapse                   |                         | ALL-REZ BFM 2002                        | ALL-REZ BFM 2002   | ALL-REZ BFM 2002   | ALL-REZ BFM 2002        | ALL-REZ BFM 2002    | ALL-REZ BFM 2002    | ALL-REZ BFM 2002    | ALL-REZ BFM 2002                       | ALL-REZ BFM 2002    |
| Immunophenotype at relapse                      |                         | common ALL                              | common ALL         | common ALL         | common ALL              | pre-B               | common              | mature T            | mature T                               | pB-ALL              |
| Age at SCT (in years)                           | 0.8                     | 8.1                                     | 3.9                | 8.0                | 6.3                     | 5.5                 | 11.2                | 6.7                 | 7.0                                    | 12.8                |
| Study for transplant                            | ALL-SCT                 | ALL-SCT                                 | ALL-SCT            | ALL-SCT            | TCRalpha/beta-Haplo2010 | ALL-SCT             | ALL-SCT             | ALL-SCT             | ALL-SCT                                | ALL-SCT             |
| MRD before SCT                                  | <1x10 <sup>-4</sup>     | <1x10 <sup>-3</sup> -1x10 <sup>-4</sup> | 1x10 <sup>-6</sup> | 1x10 <sup>-4</sup> | <1x10 <sup>-4</sup>     | <1x10 <sup>-4</sup> | <1x10 <sup>-5</sup> | <1x10 <sup>-4</sup> | 1x10 <sup>-3</sup> -1x10 <sup>-4</sup> | <1x10 <sup>-4</sup> |
| Type of SCT performed (MD, MSD, haploidentical) | MUD, 9/10 HLA-ident     | MD                                      | MSD                | MD                 | haplo (mother)          | MD                  | MD                  | MSD                 | MD                                     | MD                  |
| Type of conditioning regimen                    | Flu/Treo/Thio/ATG       | VP16, ATG, TBI                          | TBI/VP 16          | Flu/Thio/Treo/ATG  | Flu/Thio/Me/ATG         | Bu, Cy, VP16, ATG   | TBI, VP16/ATG       | TBI, VP16           | TBI, VP 16, ATG                        | TBI, VP16, ATG      |
| Time to relapse (in years) after SCT            | 0.3                     | 0.7                                     | 0.4                | 1.7                | 1.2                     | 0.3                 | 1.2                 | 0.6                 | 0.2                                    | 0.2                 |
| Type of relapse (BM, CNS, other) after SCT      | BM                      | BM                                      | BM                 | BM                 | BM                      | BM                  | BM                  | BM                  | BM                                     | BM                  |
| Immunophenotype at relapse after SCT            | common ALL              | common ALL                              | unknown            | common ALL         | common ALL              | pre-B               | not done            | T-ALL               | n/a                                    | B-lineage ALL       |
| Survival status                                 | alive                   | dead                                    | dead               | alive              | dead                    | dead                | dead                | dead                | dead                                   | dead                |

M, male; f, female; BM, bone marrow; CNS, central nervous system; TLP +, traumatic lumbar puncture; n/a, not available; SCT, stem cell transplant; MRD, minimal residual disease

**Supplementary Table 2: Blast counts and remission status of all analyzed samples.**

| Patient ID | INIT (blasts in %) | REMI (MRD) | RLPS (blasts in %) | TREMI (MRD / chimerism) |            | TRLPS (blasts in %) |
|------------|--------------------|------------|--------------------|-------------------------|------------|---------------------|
| 107        | 81%                | neg        | no relapse         | neg                     | full donor | 99%                 |
| 202        | n/a                | neg        | 98%                | neg                     | full donor | 59%                 |
| 316        | 95%                | neg        | 91%                | neg                     | full donor | 78%                 |
| 318        | n/a                | neg        | 95%                | neg                     | full donor | 96%                 |
| 337        | 97%                | neg        | 90%                | neg                     | full donor | 70%                 |
| 514        | 95%                | neg        | 86%                | neg                     | full donor | 81%                 |
| 590        | 84%                | neg        | 97%                | neg                     | full donor | 85%                 |
| 660        | 92%                | neg        | 98%                | neg                     | full donor | 80%                 |
| 685        | 93%                | neg        | 97%                | neg                     | full donor | 94%                 |
| 735        | n/a                | neg        | 89%                | neg                     | full donor | 35%                 |

n/a, sample not available; MRD, minimal residual disease, neg, MRD  $<1 \times 10^{-3}$

**Supplementary Table 3: Whole exome sequencing statistics**

|     | INIT        |               | RLPS        |               | REMI        |               | TREMI       |               | TRLPS       |               |
|-----|-------------|---------------|-------------|---------------|-------------|---------------|-------------|---------------|-------------|---------------|
|     | read count  | % covered 30x |
| 107 | 139,603,701 | 94.9          | n/a         | n/a           | 127,279,651 | 93.0          | 149,352,096 | 95.7          | 115,455,476 | 84.4          |
| 202 | n/a         | n/a           | 172,195,218 | 94.6          | 139,618,835 | 93.1          | 52,157,900  | 62.0          | 139,562,229 | 94.6          |
| 316 | 135,391,847 | 95.3          | 65,600,377  | 69.0          | 150,844,390 | 95.7          | 131,771,856 | 95.4          | 133,598,060 | 88.1          |
| 318 | 152,623,113 | 96.8          | 127,394,801 | 93.7          | 94,577,465  | 89.8          | 137,865,191 | 96.1          | 139,201,091 | 93.4          |
| 337 | 98,063,793  | 88.2          | 102,757,062 | 89.1          | 97,302,749  | 87.7          | 82,025,664  | 82.7          | 88,562,638  | 90.8          |
| 514 | 208,040,678 | 97.0          | 128,929,690 | 93.2          | 120,757,360 | 93.2          | 118,582,817 | 93.2          | 106,380,210 | 90.0          |
| 590 | 266,588,232 | 98.1          | 117,749,322 | 92.2          | 112,131,000 | 91.2          | 81,311,366  | 82.1          | 127,828,704 | 92.4          |
| 660 | 248,115,931 | 98.3          | 144,639,413 | 84.5          | 219,746,232 | 88.4          | 116,411,930 | 89.2          | 147,344,415 | 89.1          |
| 685 | 122,669,504 | 92.0          | 248,667,768 | 93.2          | 225,072,750 | 88.4          | 272,233,107 | 95.1          | 251,048,560 | 96.5          |
| 735 | n/a         | n/a           | 138,821,273 | 84.9          | 127,827,416 | 92.9          | 120,773,821 | 88.9          | 250,460,753 | 92.9          |

n/a, sample not available

**Supplementary Table 4: Full list of all identified genes carrying SNVs.**

See separate file. Gene symbols are indicated.

**Supplementary Table 5: SNVs in DNA repair pathways in the large oncogenomes**

| patient | oncogenome | chr | gen.pos.  | ref | alt | gene   | AA alt |
|---------|------------|-----|-----------|-----|-----|--------|--------|
| 590     | OG1        | 13  | 32906593  | C   | A   | BRCA2  | S326R  |
| 590     | OG1        | 5   | 74877232  | G   | A   | POLK   | R298H  |
| 590     | OG1        | 9   | 97912259  | G   | C   | FANCC  | P211R  |
| 514     | OG2        | 2   | 86267597  | C   | T   | POLR1A | G1220R |
| 514     | OG2        | 10  | 79784800  | C   | T   | POLR3A | R140Q  |
| 514     | OG2        | 2   | 86254613  | C   | T   | POLR1A | C1699Y |
| 514     | OG2        | 11  | 67120788  | A   | G   | POLD4  | L28P   |
| 514     | OG2        | 19  | 50902310  | G   | A   | POLD1  | G69R   |
| 316     | OG2        | 4   | 120981424 | T   | C   | MAD2L1 | Y156C  |
| 514     | OG3        | 16  | 22320292  | G   | A   | POLR3E | R71H   |
| 514     | OG3        | 16  | 22325015  | G   | A   | POLR3E | A147T  |
| 514     | OG3        | 17  | 7400822   | C   | T   | POLR2A | P323S  |
| 514     | OG3        | 17  | 7401078   | G   | A   | POLR2A | R364H  |
| 735     | OG3        | 3   | 121206244 | C   | T   | POLQ   | R1981Q |
| 735     | OG3        | 17  | 59821817  | C   | T   | BRIP1  | A745T  |
| 735     | OG3        | 12  | 106889850 | G   | A   | POLR3B | V911I  |
| 735     | OG3        | 14  | 45645568  | G   | A   | FANCM  | R1204H |
| 735     | OG3        | 19  | 50918754  | G   | A   | POLD1  | R875H  |
| 735     | OG3        | 22  | 41940089  | T   | C   | POLR3H | E6G    |

chr indicates chromosome; gen.pos., genomic position (hg19); ref/alt, reference/alternative, AA alt, alteration in the amino acid sequence (positions are always stated for the longest transcript variant)

***Supplementary Table 6: Recurrent SNVs in OG2 in detail***

| gene      | 107 | 202 | 316 | 318 | 337 | 514 | 590 | 660 | 685 | 735 |
|-----------|-----|-----|-----|-----|-----|-----|-----|-----|-----|-----|
| ADAMTS15  | 0   | 1   | 1   | 0   | 0   | 0   | 0   | 0   | 0   | 0   |
| ADRBK2    | 0   | 0   | 0   | 0   | 0   | 1   | 0   | 0   | 0   | 1   |
| ALMS1     | 0   | 0   | 0   | 0   | 0   | 1   | 1   | 0   | 0   | 0   |
| ANKRD62   | 0   | 1   | 1   | 0   | 0   | 0   | 0   | 0   | 0   | 0   |
| BMP5      | 0   | 0   | 0   | 0   | 1   | 0   | 0   | 1   | 0   | 0   |
| C1QL1     | 0   | 0   | 1   | 0   | 0   | 0   | 0   | 0   | 0   | 1   |
| CBR1      | 0   | 0   | 1   | 0   | 0   | 0   | 0   | 0   | 0   | 1   |
| CCDC171   | 0   | 0   | 0   | 1   | 0   | 1   | 0   | 0   | 0   | 0   |
| CCNYL2    | 0   | 0   | 0   | 0   | 0   | 0   | 1   | 0   | 1   | 0   |
| CEP128    | 0   | 1   | 0   | 0   | 0   | 1   | 0   | 0   | 0   | 0   |
| CHD7      | 0   | 0   | 0   | 1   | 0   | 1   | 0   | 0   | 0   | 0   |
| CLSTN3    | 0   | 1   | 1   | 0   | 0   | 0   | 0   | 0   | 0   | 0   |
| CPA1      | 0   | 0   | 1   | 0   | 0   | 0   | 0   | 0   | 1   | 0   |
| CPSF1     | 0   | 0   | 0   | 1   | 0   | 0   | 0   | 1   | 0   | 0   |
| CSF3R     | 0   | 0   | 0   | 1   | 0   | 1   | 0   | 0   | 0   | 0   |
| CTBP2     | 0   | 0   | 1   | 0   | 0   | 0   | 1   | 0   | 1   | 0   |
| DACH2     | 0   | 0   | 0   | 0   | 0   | 1   | 0   | 0   | 0   | 1   |
| DCHS1     | 0   | 0   | 1   | 1   | 0   | 0   | 0   | 0   | 0   | 0   |
| DEF8      | 0   | 1   | 0   | 0   | 0   | 1   | 0   | 0   | 0   | 0   |
| DGKA      | 0   | 1   | 1   | 0   | 0   | 0   | 0   | 0   | 0   | 0   |
| DPP9      | 0   | 0   | 0   | 0   | 0   | 1   | 0   | 0   | 0   | 1   |
| EIF4G1    | 0   | 0   | 1   | 0   | 0   | 0   | 0   | 0   | 0   | 1   |
| ELMSAN1   | 0   | 0   | 1   | 1   | 0   | 0   | 0   | 0   | 0   | 0   |
| FAM160A2  | 0   | 1   | 0   | 1   | 0   | 0   | 0   | 0   | 0   | 1   |
| FAT1      | 0   | 0   | 0   | 0   | 0   | 1   | 0   | 1   | 0   | 0   |
| FBN1      | 0   | 0   | 1   | 1   | 0   | 0   | 0   | 0   | 0   | 0   |
| FCGBP     | 0   | 0   | 0   | 0   | 0   | 1   | 0   | 1   | 0   | 0   |
| FICD      | 0   | 0   | 1   | 1   | 0   | 0   | 0   | 0   | 0   | 0   |
| FMN2      | 0   | 0   | 0   | 0   | 0   | 1   | 0   | 0   | 1   | 0   |
| FMNL2     | 0   | 0   | 0   | 1   | 0   | 1   | 0   | 0   | 0   | 0   |
| GPR50     | 0   | 0   | 0   | 0   | 1   | 1   | 0   | 0   | 0   | 0   |
| HEATR8    | 0   | 0   | 1   | 0   | 0   | 0   | 0   | 0   | 1   | 0   |
| HS3ST5    | 0   | 0   | 0   | 1   | 0   | 0   | 0   | 0   | 0   | 1   |
| IGSF22    | 0   | 0   | 0   | 1   | 0   | 1   | 0   | 0   | 0   | 0   |
| IKZF1     | 0   | 0   | 1   | 0   | 0   | 1   | 0   | 1   | 0   | 0   |
| INTS1     | 0   | 0   | 1   | 0   | 1   | 0   | 0   | 0   | 0   | 0   |
| INTS2     | 0   | 0   | 0   | 1   | 0   | 1   | 0   | 0   | 0   | 0   |
| KIAA0895  | 0   | 0   | 0   | 1   | 0   | 1   | 0   | 0   | 0   | 0   |
| KIAA1549L | 0   | 0   | 0   | 1   | 0   | 1   | 0   | 0   | 0   | 0   |
| KIR2DL4   | 0   | 0   | 1   | 0   | 0   | 0   | 0   | 1   | 0   | 0   |
| LRRC8E    | 0   | 0   | 1   | 1   | 0   | 0   | 0   | 0   | 0   | 0   |
| MACF1     | 0   | 0   | 0   | 1   | 0   | 1   | 0   | 0   | 0   | 0   |
| MAP3K6    | 0   | 0   | 1   | 0   | 0   | 0   | 0   | 0   | 0   | 1   |
| MIB2      | 0   | 0   | 1   | 1   | 0   | 0   | 0   | 0   | 0   | 0   |
| MTCH2     | 0   | 0   | 1   | 1   | 0   | 0   | 0   | 0   | 0   | 0   |
| MUC16     | 0   | 0   | 1   | 1   | 0   | 0   | 0   | 0   | 1   | 0   |
| MUC6      | 0   | 0   | 0   | 1   | 0   | 0   | 0   | 0   | 0   | 1   |
| NOTCH1    | 0   | 0   | 1   | 0   | 0   | 0   | 0   | 1   | 1   | 0   |
| NRAS      | 0   | 1   | 1   | 1   | 0   | 0   | 0   | 0   | 0   | 0   |
| NT5C2     | 0   | 0   | 0   | 0   | 0   | 1   | 0   | 0   | 1   | 1   |

|          |   |   |   |   |   |   |   |   |   |   |
|----------|---|---|---|---|---|---|---|---|---|---|
| OR1E1    | 0 | 0 | 1 | 1 | 0 | 0 | 0 | 0 | 0 | 0 |
| OR1S2    | 0 | 1 | 0 | 0 | 0 | 0 | 0 | 1 | 0 | 0 |
| OR3A1    | 0 | 0 | 1 | 0 | 0 | 0 | 0 | 0 | 0 | 1 |
| PALD1    | 0 | 0 | 1 | 1 | 0 | 0 | 0 | 0 | 0 | 0 |
| PDE3A    | 0 | 0 | 1 | 1 | 0 | 0 | 0 | 0 | 0 | 0 |
| PDIA2    | 0 | 0 | 1 | 1 | 0 | 0 | 0 | 0 | 0 | 0 |
| PPRC1    | 0 | 0 | 1 | 1 | 0 | 0 | 0 | 0 | 0 | 0 |
| PTPN14   | 0 | 0 | 0 | 0 | 1 | 1 | 0 | 0 | 0 | 0 |
| PYGB     | 0 | 0 | 1 | 1 | 0 | 0 | 0 | 0 | 0 | 0 |
| RBM12B   | 0 | 0 | 0 | 0 | 0 | 1 | 0 | 0 | 0 | 1 |
| RBMXL3   | 0 | 0 | 0 | 0 | 0 | 1 | 0 | 0 | 0 | 1 |
| RELN     | 0 | 0 | 0 | 1 | 0 | 1 | 0 | 0 | 0 | 0 |
| ROBO3    | 0 | 0 | 1 | 1 | 0 | 0 | 0 | 0 | 0 | 0 |
| RYR2     | 0 | 0 | 0 | 0 | 0 | 1 | 0 | 0 | 1 | 0 |
| SELENBP1 | 0 | 0 | 1 | 0 | 0 | 0 | 0 | 0 | 1 | 0 |
| SEMA6D   | 0 | 0 | 0 | 0 | 0 | 1 | 0 | 0 | 1 | 0 |
| SLC12A9  | 0 | 0 | 1 | 0 | 0 | 0 | 0 | 1 | 0 | 0 |
| SORBS2   | 0 | 0 | 0 | 0 | 0 | 1 | 0 | 0 | 1 | 0 |
| SPON2    | 0 | 0 | 0 | 1 | 0 | 1 | 0 | 0 | 0 | 0 |
| SSC5D    | 0 | 0 | 0 | 1 | 0 | 1 | 0 | 0 | 0 | 0 |
| STOML3   | 0 | 0 | 0 | 0 | 1 | 1 | 0 | 0 | 0 | 0 |
| SYTL2    | 0 | 0 | 0 | 1 | 0 | 0 | 0 | 0 | 0 | 1 |
| TCHH     | 0 | 0 | 0 | 0 | 0 | 1 | 0 | 0 | 0 | 1 |
| TECTA    | 0 | 0 | 0 | 0 | 0 | 1 | 1 | 0 | 0 | 0 |
| TOP2A    | 0 | 0 | 0 | 0 | 0 | 1 | 0 | 0 | 1 | 0 |
| TP53     | 0 | 0 | 0 | 0 | 0 | 1 | 0 | 0 | 0 | 1 |
| TRBV5-7  | 0 | 0 | 0 | 0 | 0 | 0 | 0 | 1 | 0 | 1 |
| TTN      | 0 | 1 | 0 | 0 | 0 | 1 | 0 | 0 | 0 | 0 |
| TUBGCP6  | 0 | 0 | 1 | 0 | 0 | 0 | 0 | 0 | 1 | 0 |
| TYRO3    | 0 | 0 | 1 | 0 | 0 | 0 | 1 | 0 | 0 | 0 |
| VPS13B   | 0 | 0 | 0 | 0 | 0 | 1 | 0 | 0 | 0 | 1 |
| WDR35    | 0 | 0 | 0 | 0 | 0 | 1 | 0 | 1 | 0 | 0 |
| ZDBF2    | 0 | 0 | 0 | 0 | 0 | 1 | 0 | 0 | 1 | 0 |
| ZNF460   | 0 | 0 | 0 | 0 | 0 | 1 | 0 | 0 | 0 | 1 |
| ZNF462   | 0 | 0 | 0 | 0 | 1 | 1 | 0 | 0 | 0 | 0 |
| ZNF717   | 0 | 1 | 0 | 0 | 0 | 0 | 0 | 1 | 0 | 0 |

Gene names and patient IDs are indicated; 0, no SNV in the respective gene; 1, at least one SNV present in the respective gene; only those genes are given in the above list, which are not only affected in the large oncogenomes of patients 316 and 514.

***Supplementary Table 7: Recurrent SNVs in OG3 in detail***

| gene     | 107 | 202 | 316 | 318 | 337 | 514 | 590 | 660 | 685 | 735 |
|----------|-----|-----|-----|-----|-----|-----|-----|-----|-----|-----|
| ABCA8    | 0   | 0   | 1   | 0   | 0   | 1   | 0   | 0   | 0   | 1   |
| ACAP1    | 0   | 0   | 0   | 1   | 0   | 1   | 0   | 0   | 0   | 1   |
| ADRB1    | 0   | 0   | 0   | 0   | 0   | 0   | 0   | 0   | 1   | 1   |
| APC2     | 0   | 0   | 0   | 0   | 1   | 0   | 0   | 0   | 0   | 1   |
| ATP2B2   | 0   | 0   | 0   | 0   | 0   | 1   | 0   | 1   | 0   | 0   |
| BIRC6    | 0   | 1   | 0   | 0   | 0   | 1   | 0   | 0   | 0   | 0   |
| BMP5     | 0   | 0   | 0   | 0   | 1   | 0   | 0   | 1   | 0   | 0   |
| CDC27    | 1   | 0   | 0   | 0   | 0   | 1   | 0   | 0   | 0   | 0   |
| CLASP1   | 0   | 0   | 0   | 0   | 1   | 1   | 0   | 1   | 0   | 0   |
| COL6A1   | 0   | 0   | 0   | 0   | 0   | 0   | 0   | 1   | 1   | 1   |
| CREBBP   | 0   | 1   | 0   | 0   | 0   | 1   | 0   | 0   | 0   | 0   |
| CSMD3    | 0   | 0   | 0   | 0   | 0   | 1   | 1   | 0   | 0   | 0   |
| DDC      | 0   | 0   | 0   | 0   | 0   | 1   | 1   | 0   | 0   | 0   |
| DYNC2H1  | 0   | 0   | 0   | 0   | 0   | 0   | 0   | 0   | 1   | 1   |
| FAM84A   | 1   | 0   | 0   | 0   | 0   | 0   | 0   | 0   | 0   | 1   |
| FILIP1   | 0   | 0   | 0   | 0   | 1   | 1   | 0   | 0   | 0   | 0   |
| FLT4     | 1   | 0   | 0   | 0   | 0   | 1   | 0   | 0   | 0   | 1   |
| FREM2    | 0   | 0   | 0   | 0   | 0   | 0   | 0   | 0   | 1   | 1   |
| GPR179   | 0   | 1   | 1   | 0   | 0   | 0   | 0   | 0   | 0   | 0   |
| GRIN2B   | 0   | 0   | 0   | 0   | 0   | 1   | 0   | 0   | 1   | 0   |
| HECTD4   | 0   | 1   | 0   | 1   | 0   | 0   | 0   | 0   | 0   | 0   |
| HMCN1    | 0   | 0   | 0   | 0   | 0   | 1   | 0   | 1   | 0   | 0   |
| INTS1    | 0   | 0   | 0   | 0   | 1   | 1   | 0   | 0   | 0   | 0   |
| KDM4E    | 0   | 0   | 1   | 0   | 0   | 0   | 0   | 0   | 0   | 1   |
| KIAA0368 | 1   | 0   | 0   | 0   | 0   | 1   | 0   | 0   | 0   | 0   |
| KRAS     | 1   | 0   | 0   | 0   | 0   | 0   | 0   | 1   | 0   | 0   |
| LAMB4    | 0   | 0   | 0   | 0   | 1   | 0   | 0   | 0   | 0   | 1   |
| LURAP1L  | 0   | 1   | 0   | 0   | 0   | 1   | 0   | 0   | 0   | 0   |
| MED12    | 0   | 1   | 0   | 0   | 0   | 1   | 0   | 0   | 0   | 0   |
| MEGF10   | 0   | 1   | 0   | 0   | 0   | 0   | 0   | 0   | 0   | 1   |
| MYOCD    | 0   | 1   | 0   | 0   | 0   | 1   | 0   | 0   | 0   | 0   |
| MYOM2    | 0   | 0   | 1   | 0   | 0   | 1   | 0   | 0   | 0   | 0   |
| NMRAL1   | 0   | 0   | 0   | 0   | 1   | 0   | 0   | 0   | 0   | 1   |
| NOTCH1   | 0   | 0   | 0   | 0   | 0   | 0   | 0   | 1   | 1   | 0   |
| NROB1    | 0   | 0   | 0   | 0   | 0   | 0   | 0   | 0   | 1   | 1   |
| NRAS     | 0   | 1   | 1   | 1   | 0   | 0   | 0   | 0   | 0   | 0   |
| NUP153   | 0   | 0   | 0   | 0   | 0   | 1   | 0   | 0   | 1   | 0   |
| OBSCN    | 0   | 0   | 0   | 0   | 0   | 1   | 0   | 0   | 1   | 1   |
| PAK7     | 0   | 0   | 0   | 1   | 0   | 0   | 0   | 0   | 0   | 1   |
| PI4KA    | 0   | 1   | 0   | 0   | 0   | 1   | 0   | 0   | 0   | 0   |
| PLCB1    | 0   | 0   | 0   | 0   | 1   | 0   | 0   | 1   | 0   | 0   |
| PLXNA4   | 0   | 1   | 0   | 0   | 0   | 1   | 0   | 0   | 0   | 0   |
| RADIL    | 0   | 0   | 0   | 0   | 0   | 1   | 0   | 0   | 1   | 0   |
| RBM47    | 0   | 0   | 0   | 0   | 0   | 0   | 1   | 0   | 0   | 1   |
| RHPN2    | 1   | 0   | 0   | 0   | 0   | 0   | 0   | 0   | 0   | 1   |
| SH3BP4   | 0   | 0   | 0   | 0   | 1   | 0   | 0   | 0   | 0   | 1   |
| SLCO3A1  | 0   | 0   | 0   | 0   | 0   | 1   | 1   | 0   | 0   | 0   |
| SORBS2   | 0   | 0   | 0   | 0   | 0   | 0   | 0   | 0   | 1   | 1   |
| SPTBN5   | 0   | 1   | 0   | 0   | 0   | 0   | 0   | 0   | 0   | 1   |
| TBC1D29  | 0   | 0   | 1   | 0   | 0   | 0   | 0   | 0   | 0   | 1   |
| TOP2A    | 0   | 0   | 0   | 0   | 0   | 1   | 0   | 0   | 1   | 0   |
| TP53     | 0   | 0   | 0   | 0   | 0   | 1   | 0   | 1   | 1   | 0   |
| TRAM1L1  | 0   | 0   | 0   | 0   | 0   | 1   | 0   | 0   | 1   | 0   |
| TTN      | 0   | 1   | 0   | 0   | 0   | 0   | 0   | 1   | 1   | 1   |
| URB1     | 0   | 0   | 0   | 0   | 0   | 1   | 1   | 0   | 0   | 0   |
| VWA5B1   | 0   | 1   | 0   | 0   | 0   | 0   | 0   | 0   | 0   | 1   |
| WWC3     | 0   | 0   | 1   | 0   | 0   | 1   | 0   | 0   | 0   | 1   |
| ZDBF2    | 0   | 1   | 0   | 0   | 1   | 0   | 0   | 0   | 1   | 0   |



Gene names and patient IDs are indicated; 0, no SNV in the respective gene; 1, at least one SNV present in the respective gene; only those genes are given in the above list, which are not only affected in the large oncogenomes of patients 514 and 735.

*Supplementary Table 8: Core mutation sets across those seven patients with all three oncogenomes available*

| UPN | gene name | found in    | cancer gene |
|-----|-----------|-------------|-------------|
| 316 | ATP13A1   | OG1+OG2+OG3 | No          |
| 316 | BCL6      | OG1+OG2+OG3 | Yes         |
| 316 | CUX1      | OG1+OG2+OG3 | Yes         |
| 316 | NRAS      | OG1+OG2+OG3 | Yes         |
| 318 | DST       | OG1+OG2+OG3 | No          |
| 318 | ERG       | OG1+OG2+OG3 | Yes         |
| 318 | FAM214A   | OG1+OG2+OG3 | No          |
| 318 | KCNK2     | OG1+OG2+OG3 | No          |
| 318 | OR1E1     | OG1+OG2+OG3 | No          |
| 318 | TMTC1     | OG1+OG2+OG3 | No          |
| 337 | INTS1     | OG1+OG2+OG3 | No          |
| 337 | LAMB4     | OG1+OG2+OG3 | No          |
| 337 | MDGA2     | OG1+OG2+OG3 | No          |
| 337 | MET       | OG1+OG2+OG3 | Yes         |
| 337 | TRAF3IP2  | OG1+OG2+OG3 | No          |
| 514 | EEF2      | OG1+OG2+OG3 | No          |
| 514 | UNK       | OG1+OG2+OG3 | No          |
| 590 | ADARB2    | OG1+OG2+OG3 | No          |
| 590 | ALMS1     | OG1+OG2+OG3 | No          |
| 590 | CACNA1I   | OG1+OG2+OG3 | No          |
| 590 | CAPN13    | OG1+OG2+OG3 | No          |
| 590 | CCDC82    | OG1+OG2+OG3 | No          |
| 590 | COL10A1   | OG1+OG2+OG3 | No          |
| 590 | CSMD3     | OG1+OG2+OG3 | Yes         |
| 590 | DDC       | OG1+OG2+OG3 | No          |
| 590 | GPIHBP1   | OG1+OG2+OG3 | No          |
| 590 | HILPDA    | OG1+OG2+OG3 | No          |
| 590 | OR2A2     | OG1+OG2+OG3 | No          |
| 590 | OR5K4     | OG1+OG2+OG3 | No          |
| 590 | PCDH10    | OG1+OG2+OG3 | No          |
| 590 | PGBD2     | OG1+OG2+OG3 | No          |
| 590 | PLEKHA7   | OG1+OG2+OG3 | No          |

|     |          |             |     |
|-----|----------|-------------|-----|
| 590 | RB1      | OG1+OG2+OG3 | Yes |
| 590 | TMX3     | OG1+OG2+OG3 | No  |
| 590 | URB1     | OG1+OG2+OG3 | No  |
| 660 | BMP5     | OG1+OG2+OG3 | Yes |
| 660 | EWSR1    | OG1+OG2+OG3 | Yes |
| 660 | FBXW7    | OG1+OG2+OG3 | Yes |
| 660 | KRAS     | OG1+OG2+OG3 | Yes |
| 660 | NOTCH1   | OG1+OG2+OG3 | Yes |
| 660 | SLC12A9  | OG1+OG2+OG3 | No  |
| 685 | NOTCH1   | OG1+OG2+OG3 | Yes |
| 685 | SAP130   | OG1+OG2+OG3 | No  |
| 685 | SERPINB9 | OG1+OG2+OG3 | No  |
| 685 | SORBS2   | OG1+OG2+OG3 | No  |
| 685 | SPTB     | OG1+OG2+OG3 | No  |
| 685 | TUBGCP6  | OG1+OG2+OG3 | No  |
| 685 | WHSC1    | OG1+OG2+OG3 | Yes |
| 685 | ZDBF2    | OG1+OG2+OG3 | No  |
| 685 | ZNF600   | OG1+OG2+OG3 | No  |

UPN, unique patient identifier; oncogenomes, in which the respective mutations were found, are indicated. Cancer genes are highlighted in yellow.

*Supplementary Table 9: TCR/IgH markers*

| Patient ID | Number of TCR/IG markers in total | Number of <b>stable</b> markers before/afteSCT | Number of <b>gained</b> markers after SCT | Number of <b>lost</b> markers after SCT |
|------------|-----------------------------------|------------------------------------------------|-------------------------------------------|-----------------------------------------|
| 107        | no data                           |                                                |                                           |                                         |
| 202        | no data                           |                                                |                                           |                                         |
| 316        | 3                                 | 3                                              |                                           |                                         |
| 318        | 3                                 | 2                                              | 1                                         |                                         |
| 337        | no data                           |                                                |                                           |                                         |
| 514        | 4                                 | 2                                              | 2                                         |                                         |
| 590        | 2                                 | 2                                              |                                           |                                         |
| 660        | 1                                 | 1                                              |                                           |                                         |
| 685        | 5                                 | 4                                              | 1                                         |                                         |
| 735        | 3                                 | 2                                              |                                           | 1                                       |

Patient IDs are indicated. Also indicated are numbers of stable/gained/lost markers in the post alloSCT relapse.

**Supplementary Table 10: NT5C2 mutations**

| Gene  | AA change | NM_012229 | exon | prediction  | OG1/WES      | OG1/AS | OG2/WES | OG2/AS | OG3/WES      | OG3/AS |
|-------|-----------|-----------|------|-------------|--------------|--------|---------|--------|--------------|--------|
| NT5C2 | D113N     | c.C337T   | 4    | deleterious | not detected | n.d.   | 25.61%  | n.d.   | not detected | 0.28%  |
| NT5C2 | K26E      | c.T76C    | 1    | tolerated   | not detected | < 0.2% | 37.47%  | n.d.   | not detected | < 0.2% |
| NT5C2 | R367Q     | c.C1100T  | 13   | deleterious | not detected | < 0.1% | 6.40%   | n.d.   | not detected | < 0.1% |
| NT5C2 | R367Q     | c.C1100T  | 13   | deleterious | n/a          | n/a    | 9.42%   | n.d.   | not detected | < 0.2% |

chr indicates chromosome; AA, amino acid; WES, whole exome sequencing; AS, amplicon sequencing; prediction of functional consequences was performed using PolyPhen2<sup>3</sup> and SIFT<sup>4</sup>; n.d., not done; INIT, initial leukemia; RLPS, first relapse; REMI, remission prior to SCT; TREMI, remission post SCT; TRLPS, post-allo-SCT relapse; BAFs of the respective SNV are indicated in percentages; samples, in which the SNVs were detected by WES are highlighted in blue; those, in which neither WES nor AS detected an SNV in green and those, in which only AS detected the SNV in yellow

**Supplementary Table 11: TP53 mutations**

| Patient | Gene | AA change | gen.pos.      | ref | alt | prediction     | OG1/WES      | OG1/AS | OG2/WES      | OG2/AS | OG3/WES      | OG3/AS |
|---------|------|-----------|---------------|-----|-----|----------------|--------------|--------|--------------|--------|--------------|--------|
| 514     | TP53 | R248Q     | chr17:7577538 | C   | T   | deleterious    | not detected | n.d.   | 40.48%       | n.d.   | not detected | 0.79%  |
| 514     | TP53 | R181H     | chr17:7578388 | C   | T   | deleterious    | not detected | n.d.   | not detected | 0.10%  | 48.72%       | n.d.   |
| 590     | TP53 | V173M     | chr17:7578413 | C   | T   | deleterious    | 64.00%       | n.d.   | 88.00%       | n.d.   | 46.00%       | n.d.   |
| 660     | TP53 | R248P     | chr17:7577538 | C   | G   | deleterious    | not detected | < 0.1% | 0.00%        | 0.09%  | 18.33%       | n.d.   |
| 685     | TP53 | G245S     | chr17:7577548 | C   | T   | deleterious    | not detected | < 0.1% | not detected | < 0.1% | 46.88%       | n.d.   |
| 685     | TP53 | R248Q     | chr17:7577538 | C   | T   | deleterious    | not detected | < 0.1% | not detected | < 0.1% | 6.67%        | n.d.   |
| 685     | TP53 | R196*     | chr17:7578263 | G   | A   | premature stop | not detected | < 0.2% | not detected | < 0.1% | 22.22%       | n.d.   |
| 735     | TP53 | R248Q     | chr17:7577538 | C   | T   | deleterious    | n/a          | n/a    | 6.76%        | n.d.   | not detected | < 0.1% |

chr indicates chromosome; gen.pos., genomic position (hg19); ref/alt, reference/alternative; AA, amino acid; AA, amino acid; WES, whole exome sequencing; AS, amplicon sequencing; n.d., not done; prediction of functional consequences was performed using PolyPhen2<sup>3</sup> and SIFT<sup>4</sup>; BAFs of the respective SNV are indicated in percentages; samples, in which the SNVs were detected by WES are highlighted in blue; those, in which neither WES nor AS detected an SNV in green and those, in which only AS detected the SNV in yellow

**Supplementary Table 12: Core mutation sets across all oncogenomes**

| UPN | gene name | found in | cancer gene |
|-----|-----------|----------|-------------|
| 107 | OR5F1     | OG1+OG2  | no          |
| 107 | SLITRK3   | OG1+OG2  | no          |
| 202 | AGPAT1    | OG2+OG3  | no          |
| 202 | C7        | OG2+OG3  | no          |
| 202 | CEP128    | OG2+OG3  | no          |
| 202 | CKMT1B    | OG2+OG3  | no          |
| 202 | CLSTN3    | OG2+OG3  | no          |
| 202 | CREBBP    | OG2+OG3  | yes         |
| 202 | DGKA      | OG2+OG3  | no          |
| 202 | DHRS7C    | OG2+OG3  | no          |
| 202 | LURAP1L   | OG2+OG3  | no          |

|     |          |             |     |
|-----|----------|-------------|-----|
| 202 | MEGF10   | OG2+OG3     | no  |
| 202 | MXRA5    | OG2+OG3     | no  |
| 202 | NRAS     | OG2+OG3     | yes |
| 202 | OCLN     | OG2+OG3     | no  |
| 202 | OMG      | OG2+OG3     | no  |
| 202 | PCDH19   | OG2+OG3     | no  |
| 202 | PDZD3    | OG2+OG3     | no  |
| 202 | PLAC1    | OG2+OG3     | no  |
| 202 | SCN9A    | OG2+OG3     | no  |
| 202 | SHC3     | OG2+OG3     | no  |
| 202 | SLC35G2  | OG2+OG3     | no  |
| 202 | TAX1BP1  | OG2+OG3     | no  |
| 202 | TTN      | OG2+OG3     | no  |
| 202 | VWA5B1   | OG2+OG3     | no  |
| 316 | ATP13A1  | OG1+OG2+OG3 | no  |
| 316 | BCL6     | OG1+OG2+OG3 | yes |
| 316 | CUX1     | OG1+OG2+OG3 | yes |
| 316 | NRAS     | OG1+OG2+OG3 | yes |
| 318 | DST      | OG1+OG2+OG3 | no  |
| 318 | ERG      | OG1+OG2+OG3 | yes |
| 318 | FAM214A  | OG1+OG2+OG3 | no  |
| 318 | KCNK2    | OG1+OG2+OG3 | no  |
| 318 | OR1E1    | OG1+OG2+OG3 | no  |
| 318 | TMTC1    | OG1+OG2+OG3 | no  |
| 337 | INTS1    | OG1+OG2+OG3 | no  |
| 337 | LAMB4    | OG1+OG2+OG3 | no  |
| 337 | MDGA2    | OG1+OG2+OG3 | no  |
| 337 | MET      | OG1+OG2+OG3 | yes |
| 337 | TRAF3IP2 | OG1+OG2+OG3 | no  |
| 514 | EEF2     | OG1+OG2+OG3 | no  |
| 514 | UNK      | OG1+OG2+OG3 | no  |
| 590 | ADARB2   | OG1+OG2+OG3 | no  |
| 590 | ALMS1    | OG1+OG2+OG3 | no  |
| 590 | CACNA1I  | OG1+OG2+OG3 | no  |
| 590 | CAPN13   | OG1+OG2+OG3 | no  |
| 590 | CCDC82   | OG1+OG2+OG3 | no  |
| 590 | COL10A1  | OG1+OG2+OG3 | no  |
| 590 | CSMD3    | OG1+OG2+OG3 | yes |
| 590 | DDC      | OG1+OG2+OG3 | no  |
| 590 | GPIHBP1  | OG1+OG2+OG3 | no  |
| 590 | HILPDA   | OG1+OG2+OG3 | no  |
| 590 | OR2A2    | OG1+OG2+OG3 | no  |
| 590 | OR5K4    | OG1+OG2+OG3 | no  |
| 590 | PCDH10   | OG1+OG2+OG3 | no  |

|     |          |             |     |
|-----|----------|-------------|-----|
| 590 | PGBD2    | OG1+OG2+OG3 | no  |
| 590 | PLEKHA7  | OG1+OG2+OG3 | no  |
| 590 | RB1      | OG1+OG2+OG3 | yes |
| 590 | TMX3     | OG1+OG2+OG3 | no  |
| 590 | URB1     | OG1+OG2+OG3 | no  |
| 660 | BMP5     | OG1+OG2+OG3 | yes |
| 660 | EWSR1    | OG1+OG2+OG3 | yes |
| 660 | FBXW7    | OG1+OG2+OG3 | yes |
| 660 | KRAS     | OG1+OG2+OG3 | yes |
| 660 | NOTCH1   | OG1+OG2+OG3 | yes |
| 660 | SLC12A9  | OG1+OG2+OG3 | no  |
| 685 | NOTCH1   | OG1+OG2+OG3 | yes |
| 685 | SAP130   | OG1+OG2+OG3 | no  |
| 685 | SERPINB9 | OG1+OG2+OG3 | no  |
| 685 | SORBS2   | OG1+OG2+OG3 | no  |
| 685 | SPTB     | OG1+OG2+OG3 | no  |
| 685 | TUBGCP6  | OG1+OG2+OG3 | no  |
| 685 | WHSC1    | OG1+OG2+OG3 | yes |
| 685 | ZDBF2    | OG1+OG2+OG3 | no  |
| 685 | ZNF600   | OG1+OG2+OG3 | no  |
| 735 | CBR1     | OG2+OG3     | no  |
| 735 | DACH2    | OG2+OG3     | no  |
| 735 | DOT1L    | OG2+OG3     | no  |
| 735 | EIF4G1   | OG2+OG3     | no  |
| 735 | FGFR4    | OG2+OG3     | yes |
| 735 | FOXI2    | OG2+OG3     | no  |
| 735 | HECA     | OG2+OG3     | no  |
| 735 | HS3ST5   | OG2+OG3     | no  |
| 735 | KCNC2    | OG2+OG3     | no  |
| 735 | KCNJ3    | OG2+OG3     | no  |
| 735 | MAML1    | OG2+OG3     | no  |
| 735 | MASP2    | OG2+OG3     | no  |
| 735 | NR1H2    | OG2+OG3     | no  |
| 735 | OTP      | OG2+OG3     | no  |
| 735 | PKD2L1   | OG2+OG3     | no  |
| 735 | RHPN2    | OG2+OG3     | no  |
| 735 | SLC11A1  | OG2+OG3     | no  |
| 735 | SYTL2    | OG2+OG3     | no  |
| 735 | VPS13B   | OG2+OG3     | no  |
| 735 | WWC3     | OG2+OG3     | no  |

UPN, unique patient identifier; oncogenomes, in which the respective mutations were found, are indicated. Cancer genes are highlighted in yellow.

*Supplementary Table 13: Targetable SNVs in detail*

| gene   | chr | gen.pos.  | ref | alt | AA pos | ref | alt | patient | drugs                                                                                                                | sift        | polyphen          | consequence      |
|--------|-----|-----------|-----|-----|--------|-----|-----|---------|----------------------------------------------------------------------------------------------------------------------|-------------|-------------------|------------------|
| FLT4   | 5   | 180046074 | C   | A   | 933    | G   | C   | 107     | axitinib, cabozantinib, nintedanib                                                                                   | deleterious | probably_damaging | missense_variant |
| FLT4   | 5   | 180046074 | C   | A   | 933    | G   | C   | 107     | axitinib, cabozantinib, nintedanib                                                                                   | deleterious | probably_damaging | missense_variant |
| FLT4   | 5   | 180046074 | C   | A   | 933    | G   | C   | 107     | axitinib, cabozantinib, nintedanib                                                                                   | deleterious | probably_damaging | missense_variant |
| KRAS   | 12  | 25398284  | C   | A   | 12     | G   | V   | 107     | trametinib                                                                                                           | deleterious | probably_damaging | missense_variant |
| KRAS   | 12  | 25398284  | C   | A   | 12     | G   | V   | 107     | trametinib                                                                                                           | deleterious | probably_damaging | missense_variant |
| KRAS   | 12  | 25398284  | C   | A   | 12     | G   | V   | 107     | trametinib                                                                                                           | deleterious | probably_damaging | missense_variant |
| MST1R  | 3   | 49940448  | C   | T   | 199    | V   | M   | 202     | cabozantinib, crizotinib                                                                                             | deleterious | probably_damaging | missense_variant |
| NRAS   | 1   | 115258747 | C   | G   | 12     | G   | A   | 202     | trametinib                                                                                                           | deleterious | possibly_damaging | missense_variant |
| NRAS   | 1   | 115258744 | C   | T   | 13     | G   | D   | 316     | trametinib                                                                                                           | deleterious | benign            | missense_variant |
| NRAS   | 1   | 115256528 | T   | G   | 61     | Q   | H   | 318     | trametinib                                                                                                           | deleterious | benign            | missense_variant |
| NRAS   | 1   | 115258747 | C   | T   | 12     | G   | D   | 318     | trametinib                                                                                                           | deleterious | possibly_damaging | missense_variant |
| LYN    | 8   | 56864575  | A   | G   | 180    | I   | V   | 337     | bosutinib, dasatinib                                                                                                 | tolerated   | benign            | missense_variant |
| LYN    | 8   | 56864575  | A   | G   | 180    | I   | V   | 337     | bosutinib, dasatinib                                                                                                 | tolerated   | benign            | missense_variant |
| MET    | 7   | 116339926 | C   | T   | 263    | T   | M   | 337     | cabozantinib, crizotinib                                                                                             | deleterious | probably_damaging | missense_variant |
| MET    | 7   | 116339926 | C   | T   | 263    | T   | M   | 337     | cabozantinib, crizotinib                                                                                             | deleterious | probably_damaging | missense_variant |
| MET    | 7   | 116339926 | C   | T   | 263    | T   | M   | 337     | cabozantinib, crizotinib                                                                                             | deleterious | probably_damaging | missense_variant |
| EGFR   | 7   | 55273278  | G   | A   |        |     |     | 514     | afatinib, cetuximab, erlotinib, gefitinib, lapatinib, panitumumab, vandetanib                                        | tolerated   | benign            | missense_variant |
| EGFR   | 7   | 55273278  | G   | A   | 1201   | A   | T   | 514     | afatinib, cetuximab, erlotinib, gefitinib, lapatinib, panitumumab, vandetanib                                        | tolerated   | benign            | missense_variant |
| EGFR   | 7   | 55273278  | G   | A   | 1201   | A   | T   | 514     | afatinib, cetuximab, erlotinib, gefitinib, lapatinib, panitumumab, vandetanib                                        | tolerated   | benign            | missense_variant |
| EGFR   | 7   | 55273278  | G   | A   | 1201   | A   | T   | 514     | afatinib, cetuximab, erlotinib, gefitinib, lapatinib, panitumumab, vandetanib                                        | tolerated   | benign            | missense_variant |
| EGFR   | 7   | 55273278  | G   | A   | 1201   | A   | T   | 514     | afatinib, cetuximab, erlotinib, gefitinib, lapatinib, panitumumab, vandetanib                                        | tolerated   | benign            | missense_variant |
| FLT4   | 5   | 180046343 | G   | A   | 891    | R   | C   | 514     | axitinib, cabozantinib, nintedanib                                                                                   | deleterious | probably_damaging | missense_variant |
| FLT4   | 5   | 180046343 | G   | A   | 891    | R   | C   | 514     | axitinib, cabozantinib, nintedanib                                                                                   | deleterious | probably_damaging | missense_variant |
| FLT4   | 5   | 180046343 | G   | A   | 891    | R   | C   | 514     | axitinib, cabozantinib, nintedanib                                                                                   | deleterious | probably_damaging | missense_variant |
| IL1B   | 2   | 113591101 | G   | A   | 51     | R   | *   | 514     | canakinumab                                                                                                          | NA          | NA                | stop_gained      |
| KIT    | 4   | 55569972  | C   | T   |        |     |     | 514     | axitinib, cabozantinib, dasatinib, imatinib, nilotinib, pazopanib, ponatinib, regorafenib, sorafenib, sunitinib      | tolerated   | benign            | missense_variant |
| KIT    | 4   | 55569972  | C   | T   | 280    | A   | V   | 514     | axitinib, cabozantinib, dasatinib, imatinib, nilotinib, pazopanib, ponatinib, regorafenib, sorafenib, sunitinib      | tolerated   | benign            | missense_variant |
| PARP1  | 1   | 226549680 | G   | C   | 985    | L   | V   | 514     | olaparib                                                                                                             | deleterious | probably_damaging | missense_variant |
| PRKCD  | 3   | 53217145  | G   | A   | 875    | A   | T   | 514     | trametinib                                                                                                           | tolerated   | probably_damaging | missense_variant |
| PRKCD  | 3   | 53217145  | G   | A   | 194    | A   | T   | 514     | trametinib                                                                                                           | tolerated   | probably_damaging | missense_variant |
| PRKCE  | 2   | 46203640  | G   | A   | 194    | A   | T   | 514     | trametinib                                                                                                           | tolerated   | probably_damaging | missense_variant |
| KRAS   | 12  | 25398284  | C   | A   | 12     | G   | V   | 660     | trametinib                                                                                                           | deleterious | probably_damaging | missense_variant |
| KRAS   | 12  | 25398284  | C   | A   | 12     | G   | V   | 660     | trametinib                                                                                                           | deleterious | probably_damaging | missense_variant |
| KRAS   | 12  | 25398284  | C   | A   | 12     | G   | V   | 660     | trametinib                                                                                                           | deleterious | probably_damaging | missense_variant |
| KDR    | 4   | 55955112  | C   | G   |        |     |     | 685     | axitinib, cabozantinib, nintedanib, pazopanib, ponatinib, ramucirumab, regorafenib, sorafenib, sunitinib, vandetanib | deleterious | benign            | missense_variant |
| DNMT3A | 2   | 25469632  | C   | T   | 379    | R   | H   | 735     | azacitidine, decitabine                                                                                              | deleterious | benign            | missense_variant |
| DNMT3A | 2   | 25469632  | C   | T   | 379    | R   | H   | 735     | azacitidine, decitabine                                                                                              | deleterious | benign            | missense_variant |
| DNMT3A | 2   | 25469632  | C   | T   | 379    | R   | H   | 735     | azacitidine, decitabine                                                                                              | deleterious | benign            | missense_variant |
| DNMT3A | 2   | 25469632  | C   | T   | 379    | R   | H   | 735     | azacitidine, decitabine                                                                                              | deleterious | benign            | missense_variant |
| DNMT3A | 2   | 25469632  | C   | T   | 379    | R   | H   | 735     | azacitidine, decitabine                                                                                              | deleterious | benign            | missense_variant |
| FGFR3  | 4   | 1803564   | C   | T   | 248    | R   | C   | 735     | nintedanib, pazopanib, ponatinib                                                                                     | deleterious | probably_damaging | missense_variant |
| FGFR3  | 4   | 1803564   | C   | T   | 248    | R   | C   | 735     | nintedanib, pazopanib, ponatinib                                                                                     | deleterious | probably_damaging | missense_variant |
| FGFR3  | 4   | 1803564   | C   | T   | 248    | R   | C   | 735     | nintedanib, pazopanib, ponatinib                                                                                     | deleterious | probably_damaging | missense_variant |
| FGFR3  | 4   | 1803564   | C   | T   | 248    | R   | C   | 735     | nintedanib, pazopanib, ponatinib                                                                                     | deleterious | probably_damaging | missense_variant |
| FGFR4  | 5   | 176519774 | C   | T   | 461    | T   | M   | 735     | nintedanib, ponatinib                                                                                                | deleterious | probably_damaging | missense_variant |
| FGFR4  | 5   | 176519774 | C   | T   | 461    | T   | M   | 735     | nintedanib, ponatinib                                                                                                | deleterious | probably_damaging | missense_variant |
| FGFR4  | 5   | 176519774 | C   | T   | 461    | T   | M   | 735     | nintedanib, ponatinib                                                                                                | deleterious | probably_damaging | missense_variant |
| FGFR4  | 5   | 176519774 | C   | T   | 461    | T   | M   | 735     | nintedanib, ponatinib                                                                                                | deleterious | probably_damaging | missense_variant |
| FGFR4  | 5   | 176519774 | C   | T   | 461    | T   | M   | 735     | nintedanib, ponatinib                                                                                                | deleterious | probably_damaging | missense_variant |
| FGR    | 1   | 27939583  | G   | A   | 478    | P   | S   | 735     | bosutinib, dasatinib, ibrutinib                                                                                      | deleterious | benign            | missense_variant |
| FGR    | 1   | 27939583  | G   | A   | 478    | P   | S   | 735     | bosutinib, dasatinib, ibrutinib                                                                                      | deleterious | benign            | missense_variant |
| FLT4   | 5   | 180045859 | C   | T   | 971    | R   | Q   | 735     | axitinib, cabozantinib, nintedanib                                                                                   | tolerated   | benign            | missense_variant |
| FLT4   | 5   | 180045859 | C   | T   | 971    | R   | Q   | 735     | axitinib, cabozantinib, nintedanib                                                                                   | tolerated   | benign            | missense_variant |
| FLT4   | 5   | 180045859 | C   | T   | 971    | R   | Q   | 735     | axitinib, cabozantinib, nintedanib                                                                                   | tolerated   | benign            | missense_variant |
| GAK    | 4   | 843694    | C   | T   | 1274   | V   | M   | 735     | bosutinib, dasatinib, erlotinib, gefitinib                                                                           | deleterious | probably_damaging | missense_variant |
| GAK    | 4   | 843694    | C   | T   | 1274   | V   | M   | 735     | bosutinib, dasatinib, erlotinib, gefitinib                                                                           | deleterious | probably_damaging | missense_variant |
| GAK    | 4   | 843694    | C   | T   | 1274   | V   | M   | 735     | bosutinib, dasatinib, erlotinib, gefitinib                                                                           | deleterious | probably_damaging | missense_variant |
| IGF1R  | 15  | 99456467  | G   | A   | 595    | R   | H   | 735     | ceritinib                                                                                                            | tolerated   | benign            | missense_variant |
| IGF1R  | 15  | 99456467  | G   | A   | 595    | R   | H   | 735     | ceritinib                                                                                                            | tolerated   | benign            | missense_variant |
| IGF1R  | 15  | 99456467  | G   | A   | 595    | R   | H   | 735     | ceritinib                                                                                                            | tolerated   | benign            | missense_variant |
| MERTK  | 2   | 112722824 | G   | A   | 272    | V   | M   | 735     | bosutinib, crizotinib, sunitinib                                                                                     | deleterious | probably_damaging | missense_variant |
| MERTK  | 2   | 112722824 | G   | A   | 272    | V   | M   | 735     | bosutinib, crizotinib, sunitinib                                                                                     | deleterious | probably_damaging | missense_variant |
| MERTK  | 2   | 112722824 | G   | A   | 272    | V   | M   | 735     | bosutinib, crizotinib, sunitinib                                                                                     | deleterious | probably_damaging | missense_variant |
| NRG3   | 10  | 84745302  | C   | T   | 702    | R   | *   | 735     | afatinib, emtansine, lapatinib, pertuzumab, trastuzumab                                                              | NA          | NA                | stop_gained      |
| NRG3   | 10  | 84745302  | C   | T   | 702    | R   | *   | 735     | afatinib, emtansine, lapatinib, pertuzumab, trastuzumab                                                              | NA          | NA                | stop_gained      |
| NRG3   | 10  | 84745302  | C   | T   | 702    | R   | *   | 735     | afatinib, emtansine, lapatinib, pertuzumab, trastuzumab                                                              | NA          | NA                | stop_gained      |
| NRG3   | 10  | 84745302  | C   | T   | 702    | R   | *   | 735     | afatinib, emtansine, lapatinib, pertuzumab, trastuzumab                                                              | NA          | NA                | stop_gained      |
| NRG3   | 10  | 84745302  | C   | T   | 702    | R   | *   | 735     | afatinib, emtansine, lapatinib, pertuzumab, trastuzumab                                                              | NA          | NA                | stop_gained      |
| NRG3   | 10  | 84745302  | C   | T   | 702    | R   | *   | 735     | afatinib, emtansine, lapatinib, pertuzumab, trastuzumab                                                              | NA          | NA                | stop_gained      |
| NRG3   | 10  | 84745302  | C   | T   | 702    | R   | *   | 735     | afatinib, emtansine, lapatinib, pertuzumab, trastuzumab                                                              | NA          | NA                | stop_gained      |
| PDGFRA | 4   | 55138618  | C   | T   | 432    | T   | M   | 735     | axitinib, dasatinib, imatinib, nintedanib, pazopanib, ponatinib, sorafenib                                           | tolerated   | benign            | missense_variant |
| PDGFRA | 4   | 55138618  | C   | T   | 432    | T   | M   | 735     | axitinib, dasatinib, imatinib, nintedanib, pazopanib, ponatinib, sorafenib                                           | tolerated   | benign            | missense_variant |
| PDGFRA | 4   | 55138618  | C   | T   | 432    | T   | M   | 735     | axitinib, dasatinib, imatinib, nintedanib, pazopanib, ponatinib, sorafenib                                           | tolerated   | benign            | missense_variant |
| PHLPP2 | 16  | 71686887  | C   | T   |        |     |     | 735     | Bosutinib, Gefitinib, Idelalisib, Lapatinib, Nintedanib, Pertuzumab, Ponatinib, Siltuximab, Tocilizumab, Trastuzumab | deleterious | probably_damaging | missense_variant |
| PHLPP2 | 16  | 71686887  | C   | T   |        |     |     | 735     | Bosutinib, Gefitinib, Idelalisib, Lapatinib, Nintedanib, Pertuzumab, Ponatinib, Siltuximab, Tocilizumab, Trastuzumab | deleterious | probably_damaging | missense_variant |
| PHLPP2 | 16  | 71686887  | C   | T   | 875    | A   | T   | 735     | Bosutinib, Gefitinib, Idelalisib, Lapatinib, Nintedanib, Pertuzumab, Ponatinib, Siltuximab, Tocilizumab, Trastuzumab | deleterious | probably_damaging | missense_variant |
| PRKCE  | 2   | 46411917  | G   | A   | 162    | R   | H   | 735     | trametinib                                                                                                           | tolerated   | benign            | missense_variant |
| SHH    | 7   | 155595695 | C   | T   | 704    | R   | Q   | 735     | vismodegib                                                                                                           | tolerated   | NA                | missense_variant |
| SHH    | 7   | 155595695 | C   | T   | 430    | A   | T   | 735     | vismodegib                                                                                                           | tolerated   | NA                | missense_variant |
| SHH    | 7   | 155595695 | C   | T   | 430    | A   | T   | 735     | vismodegib                                                                                                           | tolerated   | NA                | missense_variant |
| SHH    | 7   | 155595695 | C   | T   | 430    | A   | T   | 735     | vismodegib                                                                                                           | tolerated   | NA                | missense_variant |

chr indicates chromosome; gen.pos., genomic position (hg19); ref/alt, reference/alternative; AA pos, amino acid position; prediction of functional consequences was performed using PolyPhen2<sup>3</sup> and SIFT<sup>4</sup>; oncogenomes, in which the respective alterations are present, are highlighted in bold text; in case of several ensemble transcripts ID, the respective SNV is mapped to all available transcripts (see e.g. DNM T3A). Please refer to Suppl. Table 9 for the AA positions of the TP53 mutations.



## Supplementary Figures

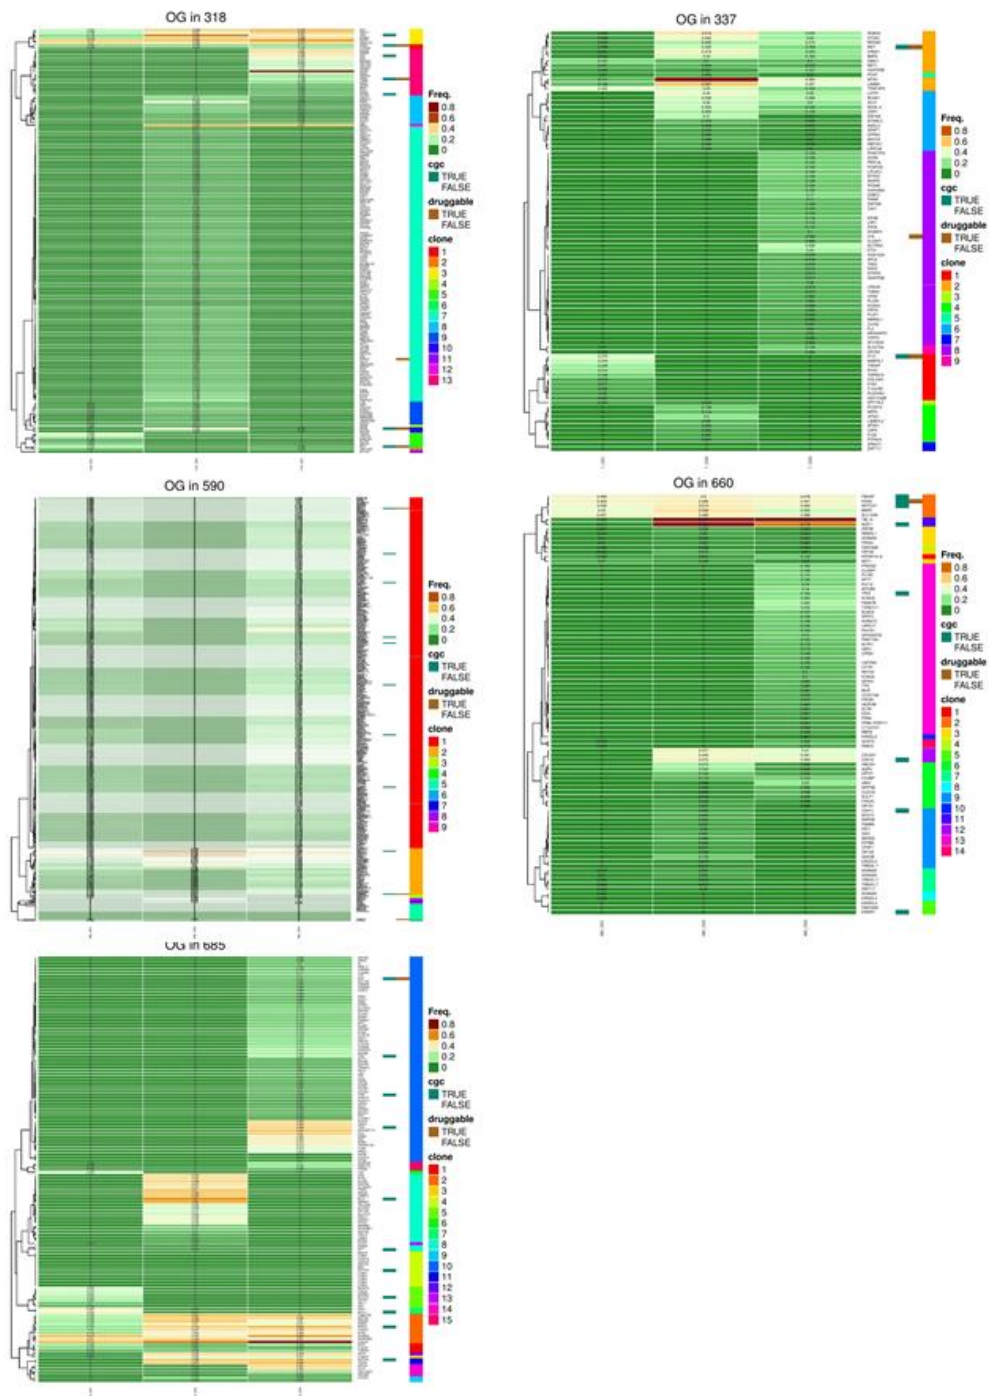

**Supplementary Figure 1: Heatmaps of mutational clusters.**

Shown are the seven patients for whom information on all three oncogenomes was available. Different mutational patterns can be observed, both within as well as across the patients. Genes are displayed as heatmaps, in which the observed mutational frequencies dictate the position in the cluster tree. Shades from green to yellow to brown refer to the observed mutational frequencies. The colors to the right of the heatmap

indicate the individual mutational clusters (termed “clones” in the figure), which are also displayed in Supplementary Figure 2. Green / brown bars indicate, whether a particular genes is part of the cancer gene census or is a druggable gene, respectively.

### Supplementary References

1. Cibulskis K, Lawrence MS, Carter SL, et al. Sensitive detection of somatic point mutations in impure and heterogeneous cancer samples. *Nat Biotechnol.* 2013;31(3):213-219.
2. Koboldt DC, Zhang Q, Larson DE, et al. VarScan 2: somatic mutation and copy number alteration discovery in cancer by exome sequencing. *Genome Res.* 2012;22(3):568-576.
3. Adzhubei IA, Schmidt S, Peshkin L, et al. A method and server for predicting damaging missense mutations. *Nat Methods.* 2010;7(4):248-249.
4. Kumar P, Henikoff S, Ng PC. Predicting the effects of coding non-synonymous variants on protein function using the SIFT algorithm. *Nat Protoc.* 2009;4(7):1073-1081.
